1 **HiCRes: a computational method to estimate and predict the resolution of HiC libraries**

2

3 Claire Marchal, Nivedita Singh, Ximena Corso-Díaz, Anand Swaroop

4

5 Neurobiology, Neurodegeneration & Repair Laboratory, National Eye Institute, National

6 Institutes of Health, MSC0610, 6 Center Drive, Bethesda, MD 20892, USA

7

8 \*Correspondence should be addressed to Claire Marchal ([claire.marchal@nih.gov](mailto:claire.marchal@nih.gov)) or Anand

9 Swaroop ([swaropa@nei.nih.gov](mailto:swaropa@nei.nih.gov))

10

11

12 Key words: Hi-C; 3D chromatin; resolution prediction; docker

13

14

15 **Abstract:**

16

17 Three-dimensional (3D) conformation of the chromatin is crucial to stringently regulate gene  
18 expression patterns and DNA replication in a cell-type specific manner. HiC is a key technique for  
19 measuring 3D chromatin interactions genome wide. Estimating and predicting the resolution of a  
20 library is an essential step in any HiC experimental design. Here, we present the mathematical  
21 concepts to estimate the resolution of a library and predict whether deeper sequencing would  
22 enhance the resolution. We have developed HiCRes, a docker pipeline, by applying these concepts  
23 to human and mouse HiC libraries.

24

25 **Background:**

26

27 Within mammalian nuclei, chromatin is compacted following a well-defined three-dimensional  
28 (3D) organization. Chromosomes remain separated into distinct territories that can be labeled and  
29 observed by microscopy [1, 2]. Within each chromosome, the chromatin can be organized into  
30 megabase-size domains, called topologically associated domains (TADs) [3, 4]. At the kilobase  
31 level, two genomic loci can join together to form chromatin loops [4-6]. This organization is  
32 dynamic and changes during distinct stages of a cell's life including cell cycle [7-9], differentiation  
33 [5, 10, 11] and senescence [12, 13]. 3D chromatin organization is associated with gene expression  
34 regulation [14-19] and DNA replication timing [7, 20-24], but the relationship between these  
35 features is still poorly known. Chromosome Conformation Capture technologies, such as HiC,  
36 have permitted access to 3D chromatin interactions genome-wide [25-27] and are among the most  
37 common techniques used to explore the relationship between the 3D genome and chromatin  
38 associated processes.

39

40 HiC libraries are generated by in-nuclei enzymatic digestion of cross-linked chromatin. Digested  
41 chromatin is then ligated producing chimeric fragments of neighbor chromatin loci, which are  
42 purified and sequenced pairwise. Interactions between loci, separated by a restriction digestion  
43 site, are kept for further analysis [25]. Many laboratories are implementing HiC to examine 3D  
44 chromatin interactions to get a better insight into a biological process. "How deep do I need to  
45 sequence my HiC library?" is one of the first questions when deciding to perform HiC experiments.  
46 The answer is far from being trivial and depends on the chromatin structures to be observed, such  
47 as compartments, TADs or loops, as well as the quality of the HiC library [4]. Compartments are

48 very robust across sequencing depths and can be called on small HiC libraries [20, 28]. On the  
49 contrary, loops calling requires high resolution HiC obtained by deep sequencing of good quality  
50 libraries [6, 28]. High sequencing depth represents a big expense; thus, the first step is usually to  
51 sequence the HiC library at low depth (e.g. 100M read pairs), which allows one to evaluate its  
52 quality and assess the usefulness of deeper sequencing that is needed for a higher resolution.  
53 Accurately predicting the future resolution of a HiC library would allow a user to then choose how  
54 deep the library need to be sequenced to obtain a given resolution. While sequencing depth is the  
55 main determinant of the resolution, it is important to note that the resolution of HiC data is limited  
56 by the restriction enzyme used in the assay [27, 28]. For example, HindIII restriction enzyme  
57 produces an average fragment length of 4 kb on the human genome, and thus the best possible  
58 resolution will be around 4 kb [26]. For assays using MboI or DpnII, one can achieve a resolution  
59 of around 500 bp [26].

60

61 A useful definition of the resolution for HiC library was set up by Rao and colleagues [6]. This  
62 definition sets the resolution of a HiC experiment as the minimum size window which, when used  
63 to calculate the genome coverage, leads to 80% of the windows covered by at least 1000 reads [6,  
64 27]. Mathematically, the resolution is the window size for which 20<sup>th</sup> percentile of the reads per  
65 window equals 1000. This definition is based on the global distribution of the coverage and allows  
66 an estimation of the range of interactions that can be observed in a given library, providing an  
67 excellent standard for comparison among multiple datasets.

68

69 Nevertheless, the relationship between the resolution of a HiC experiment and the size of its library  
70 is non-linear [27]. This relationship depends on: 1) the complexity of the library, which can be

71 predicted using published tools such as preseq [29], 2) the percentage of uniquely mapped valid  
72 read pairs, directly proportional to the number of de-duplicated reads, and 3) the distribution of  
73 uniquely mapped valid read pairs, which can be estimated and predicted by the model presented  
74 in this study. We included all these steps within a single pipeline and developed a docker image,  
75 called HiCRes. This is the first method to estimate the resolution of a given HiC library and to  
76 predict its resolution at a specific sequencing depth.

77

## 78 **Results:**

79

### 80 **Modeling the HiC fragments distribution on the genome.**

81 Elucidation of relationship between the resolution and the quantity of HiC interactions means  
82 understanding the relationship between the read coverage distribution, the window size used to  
83 calculate the coverage, and the number of read pairs. To model the relationship between these  
84 parameters, we used a large high resolution HiC library from human cells GM12878 [6]. We first  
85 explored the association of the read coverage distribution to the window size and the number of  
86 read pairs. We observed that the distribution of uniquely mapped valid read pairs on the genome  
87 varies perfectly linearly with the window's size used to assess the coverage (Figure 1 A). Similarly,  
88 this distribution varies linearly with the number of valid reads (Figure 1 B). Thus, the 20<sup>th</sup>  
89 percentile of coverage can be considered as a linear function of the window size for a given number  
90 of reads, as well as a linear function of the number of valid reads for a given window size. From a  
91 mathematical point of view, these two functions are partial derivatives of a third function  
92 describing the 20<sup>th</sup> percentile of coverage *versus* the window size and the number of valid read  
93 pairs. Here, we show that this last function can be written as Eq. (1), where  $x$  is the window size,

94 y the number of valid read pairs and a, b, c and d are some constants to be determined for each  
95 library (see methods). Under the hypothesis that the 20<sup>th</sup> percentile of the coverage only depends  
96 on the read number and the window size, Eq. (1) should be sufficient to predict the 20<sup>th</sup> percentile  
97 of the read of coverage given any read number and window size pairs. To confirm this hypothesis,  
98 we manually assessed the 20<sup>th</sup> percentile of the coverage for several read number / window size  
99 pairs in the GM12878 HiC library. The function described by Eq (1) perfectly overlaps the  
100 observed 20<sup>th</sup> percentile coverages from different subsamples and window sizes used for the  
101 coverage assessment of a high resolution Hi-C from GM12878 cells (Figure 1 C). We realized that  
102 Eq (1) accurately describes the relationship between the 20<sup>th</sup> percentile of the coverage, the read  
103 number and the window size. From this equation, the resolution, *i.e.* the window size for which  
104 the 20<sup>th</sup> percentile is equal to 1000 reads, can be written as Eq. (2).

105

106 Eq. (1): 20<sup>th</sup> percentile coverage relation to the window size (x) and the valid read pairs (y)

107 
$$p(x, y) = axy + bx + cy + d$$

108

109 Eq. (2): Resolution relation to the valid read pairs (y)

110 
$$r(y) = \frac{1000 - cy - d}{ay + b}$$

111

## 112 **Validation of the model using published datasets.**

113 To validate our model, we used several subsamples of high-resolution HiC datasets that were  
114 publicly available (see methods) [6, 30]. We predicted the resolution *versus* the number of valid  
115 read pairs using a 100M sequenced read pairs subsample of the library. We then randomly  
116 subsampled the GM12878 HiC library into several subsamples. For each subsample, we assessed

117 the number of valid read pairs and measured the interval including the observed resolution (see  
118 method). For each subsample, the predicted resolution is within the interval comprising the  
119 observed resolution (Figure 1 D). We reproduced this result using two others public HiC libraries,  
120 in HMEC and NHEK cell lines (Supplementary Figure 1). For all these three datasets tested, our  
121 predictions overlapped perfectly with the observed intervals, thereby validating our model of HiC  
122 resolution prediction from the number of valid read pairs.

123

#### 124 **Implementation of the pipeline HiCRes.**

125 Our model successfully links the number of valid HiC interactions to the resolution. Nevertheless,  
126 to predict the sequencing depth required for a library to reach a given resolution, the number of  
127 valid interactions needs to be linked to the sequencing depth. To do so, we developed HiCRes, a  
128 user-friendly pipeline associating our model to the published tools for measuring any HiC  
129 resolution from raw or analyzed data (Figure 2 A). HiCRes is able to predict the resolution *versus*  
130 the sequencing depth of any HiC library of 100M read pairs or more. For this purpose, our pipeline  
131 measures the library complexity and predicts future yields using the preseq algorithm [29], which  
132 we confirmed to be accurate on HiC libraries (Supplementary Figure 2). After estimating the future  
133 yield of the library, the percentage of uniquely mapped valid read pairs is evaluated using bowtie2  
134 [31] and HiCUP [32]. Next, the constants a, b, c and d of Eq. (1) are calculated using our model.  
135 Finally, the predicted resolution can be calculated for different sequencing depths. For inter-  
136 operability, our tool is available as a docker image and can be run on any system where either  
137 docker or singularity is installed.

138

139 To validate the accuracy of the pipeline to predict the resolution of HiC libraries from raw  
140 sequenced reads, we tested HiCRes pipeline on public HiC datasets. We subsampled the  
141 GM12878, HMEC and NHEK HiC libraries to 100M sequenced read pairs. We then used HiCRes  
142 to predict the resolution each subsampled library will reach for various sequencing depths. To test  
143 the accuracy of our predictions, we measured the resolution interval, which is an interval  
144 comprising the observed resolution for the whole public library. For each library tested, the  
145 prediction of the resolution corresponded with the observed resolution interval (Figure 2 B-D).  
146 These analyses confirm the accuracy of HiCRes to predict HiC library resolutions at different  
147 sequencing depths based on 100M sequenced read pairs.

148

#### 149 **Validation of HiCRes pipeline on diverse HiC conditions**

150 HiCRes has been developed using HiC data from MboI digested chromatin in human cell lines.  
151 The use of different restriction enzymes leads to different fragments sizes (Supplementary Figure  
152 3) and could influence the accuracy of our model. To test whether our model and this pipeline can  
153 be extended to other species and HiC conditions, we used several public and lab produced datasets.  
154 First, we tested HiCRes on HindIII digested chromatin HiC using a public GM12878 HiC library  
155 [6] performed using HindIII digestion. We subsampled the library to 100M sequenced read pairs  
156 and used HiCRes pipeline to estimate the resolution at various sequencing depths as described  
157 above. We then compared the predictions to the observed resolution interval of the full library.  
158 The prediction perfectly overlapped with the observed resolution interval (Figure 3 A). Similarly,  
159 we tested HiCRes on postmitotic cell types including HiC libraries from MboI digested chromatin  
160 of mouse retina [30] (Figure 3 B) and those performed using a kit from Arima technology on



161 purified mouse rod photoreceptors generated in our Laboratory (Figure 3 C). For all these various  
162 samples, the predictions perfectly corroborated the observed resolution intervals.

163

#### 164 **Using *cis*-interactions to calculate the resolution.**

165 Most tools employed to call 3D chromatin structures use contact maps generated on each  
166 chromosome [15, 33]. Thus, only the interactions occurring within the same chromosome, *i.e.* the  
167 *cis*-interactions, are usually informative for calling compartments, TADs or loops. Accordingly,  
168 we added the prediction of the resolution using *cis*-interactions only to our pipeline output.  
169 Because *cis*-interactions represent a sub-fraction of all interactions, a lower resolution is expected  
170 when using *cis*-interactions only to estimate the resolution, compared to all interactions. For each  
171 library tested, our predictions are in accordance with this (Figure 4 A-B, Supplementary Figure 4  
172 A-D). As it would be intuitively expected, we observe a stronger difference between the  
173 predictions using *cis* versus all interactions in a library with a high proportion of *trans*-interactions  
174 (Figure 4 B), compared to a library with a lower proportion (Figure 4 A).

175

#### 176 **Discussion:**

177

178 Here, we present HiCRes, a tool to estimate and predict the resolution a given HiC library will  
179 reach when sequenced deeper. We demonstrate that HiCRes accurately predicts the resolution of  
180 HiC libraries obtained from distinct human and mouse cell types generated using different  
181 restriction digestion enzymes. HiCRes is available as a docker image, making it possible to  
182 perform different steps of the pipeline using one simple command line.

183

184 Two conditions need to be satisfied to apply our model; these are the linear relationships between  
185 the 20<sup>th</sup> percentile of the read coverage with the window size used to calculate the coverage and  
186 between the 20<sup>th</sup> percentile read coverage, and the number of valid interactions. Our pipeline tests  
187 whether these two conditions are met and will not produce any estimation or prediction if these  
188 conditions are not satisfied. In that scenario, the resolution can be manually measured as described  
189 in the method section and by Rao and colleagues [6], but no prediction can be calculated .

190

191 HiCRes uses sequenced reads as input to produce a prediction of the resolution *versus* the  
192 sequencing depth or already processed HiC data to realize a prediction of the resolution *versus* the  
193 number of valid interactions. Using 40 CPUs, HiCRes predicts the resolution of a 200M read pair  
194 library in approximately 5h. Alternatively, processed data can be used as an input for HiCRes.  
195 In this case, using 40 CPUs, HiCRes will take approximately 30 minutes to produce the  
196 predictions. Nevertheless, when starting with already analyzed data, the predictions will be done  
197 only in relation to the number of valid interactions, not to the library size. Thus, we recommend  
198 running HiCRes on raw sequenced reads to predict the resolution that small libraries can reach at  
199 deeper sequencing levels. To simply estimate the resolution of a given library (with no need for  
200 prediction at different sequencing depths), we recommend running HiCRes directly on processed  
201 data.

202

203 An important parameter to consider when estimating the resolution of any HiC experiment is the  
204 inclusion of *trans*-interactions (*i.e.*, inter-chromosomal interactions) in the count. The original  
205 definition of the resolution by Rao and colleagues included the *trans*-interactions in the valid read  
206 count [6]. Nevertheless, in their data, *trans*-interactions represented around 20% of the valid reads

207 and did not influence drastically the final resolution at high sequencing depths. However, HiC  
208 libraries may have a high level of *trans*-interactions when samples (such as tissues) are harder to  
209 process. For example, the published mouse retina dataset that we selected possesses a high level  
210 of *trans*-interactions [30]. Whether we include these interactions or not in calculating the  
211 resolution would have a significant impact on the final result. Given that HiC contact maps are  
212 generated usually by chromosome with *cis*-interactions only and are used as input for many tools  
213 to perform further analysis (compartments, TADs or loop calling) [15, 33], we recommend using  
214 the resolution estimated from the *cis*-interactions only.

215

216 The resolution calculated by this approach is a powerful way to estimate the size limit of the  
217 chromatin structures to be observed. This prediction can be used to compare different libraries and  
218 will help on deciding the sequencing depth needed for a given library. Nevertheless, this number  
219 does not directly reflect the quality of the HiC experiment and other quality indicators should be  
220 used in complement, such as the proportion of valid interactions, the *cis- versus trans*-interactions  
221 ratio, the distance-dependent decay of interaction frequency [28] or the reproducibility among  
222 replicates [34]. Moreover, the resolution is an average value for the whole genome while local  
223 resolutions can be impacted by the read mappability, the presence of restriction digestion sites and  
224 the accessibility of such sites to the restriction digestion enzymes. Thus, the measured resolution  
225 does not replace the statistical analysis for assessing the local significance of any observed  
226 enrichment in a HiC experiment [27].

227

228 **Methods:**

229

## 230 Datasets used in this study

| Sample  | Specie | Restriction enzyme | Size (read pairs) | Ref.*  | SRA number | Reference                |
|---------|--------|--------------------|-------------------|--------|------------|--------------------------|
| GM12878 | Human  | MboI               | 486,848,168       | HIC003 | SRR1658572 | Rao et al., 2014 [6]     |
| Retina  | Mouse  | MboI               | 1,433,302,476     | -      | SRR9906313 | Norrie et al., 2019 [30] |
| HMEC    | Human  | MboI               | 456,577,382       | HIC058 | SRR1658680 | Rao et al., 2014 [6]     |
| NHEK    | Human  | MboI               | 536,747,653       | HIC067 | SRR1658691 | Rao et al., 2014 [6]     |
| GM12878 | Human  | HindIII            | 1,195,923,990     | HIC035 | SRX764970  | Rao et al., 2014 [6]     |
| Rods    | Mouse  | Arima              | 194,604,167       | -      | GSE152491  | This study               |

231

232 \* Reference in the study from which the dataset comes from.

233

## 234 Subsampling libraries

235 Libraries are downloaded from SRA and fastq files are extracted using SRAtoolkit  
236 ([ncbi.github.io/sra-tools/](https://ncbi.github.io/sra-tools/)). These files are converted in text files with one complete read pair  
237 (sequence and quality) per line. Random lines are then selected using awk bash function and its  
238 internal function rand. Seeds for the random extraction are set up as the script running date and  
239 time. This method allows the fast extraction of a chosen proportion of reads, while not using the  
240 computer RAM. Libraries are subsampled to approximatively 100M, 200M, 300M, 400M and  
241 500M (or the maximum size of the library) read pairs.

242

## 243 Mapping and filtering

244 Subsampled libraries are mapped and filtered using bowtie2 [31] and HiCUP [32], on hg38 (human  
245 samples) or mm10 (mouse sample), using genomes digested *in silico* by MboI, HindIII or the  
246 Arima kit enzymes (Supplementary Figure 3). Proportions of reads pairing, mapping and filtering

247 are calculated with HiCUP. These proportions are constant and independent of the library  
248 sequencing depth. Similarly, the proportion of cis- *versus* trans-interaction is independent of the  
249 library sequencing depth (data not shown).

250

### 251 **Measuring the observed resolution interval**

252 The final HiCUP output for each subsample is processed through bedtools [35] to calculate the  
253 read coverage per window using several window sizes ranging from 100 bp to 100 kb. Then the  
254 20<sup>th</sup> percentile of the coverage is calculated using R. With these analyses, the 20<sup>th</sup> percentile of the  
255 coverage is measured for each window size. An interval containing the HiC resolution of each  
256 subsample is inferred from these values: the minimum of this interval is the larger window size for  
257 which the 20<sup>th</sup> percentile of the coverage is below 1000 reads, while the maximum of this interval  
258 is the smallest window size for which the 20<sup>th</sup> percentile of coverage is higher than 1000 reads.

259

### 260 **Combining observed resolution to an equation**

261 The 20<sup>th</sup> percentile is depending on the number of valid read pairs and on the window size used to  
262 calculate the coverage. Thus, it can be written as a function  $f(x,y)$  where  $x$  is the window size and  
263  $y$  the number of valid read pairs. We observed that for a given  $x$  value, the 20<sup>th</sup> percentile is varying  
264 linearly with  $y$ , which mathematically can be written as Eq. (3).

265

266 Eq. (3):

$$267 \quad \frac{\partial f}{\partial y} = \alpha x + \beta$$

268

269 Similarly, for a given y value, the 20<sup>th</sup> percentile is varying linearly with x, which can be written  
270 as Eq. (4).

271

272 Eq. (4):

$$273 \quad \frac{\partial f}{\partial x} = \gamma y + \delta$$

274

275 The function f(x,y) satisfying these two equations can be written as Eq. (1).

276

### 277 **Calculating the coefficient of Eq. (1)**

278 The coefficients of Eq. (1) are calculated using a 100M read pairs subsample. The linearity of the  
279 distribution of the uniquely mapped valid read pairs with the windows size is controlled using the  
280 20<sup>th</sup> percentiles from 20 kb, 50 kb and 100kb window size coverage of a 20M valid read pairs  
281 subsample. The linearity of the distribution of the uniquely mapped valid read pairs with the read  
282 pairs number are controlled by calculating the correlation between 20M, an intermediate number  
283 of read pairs and the maximum number of valid read pairs in the sample. Data tested are considered  
284 to be linear if the correlation between the 3 points is superior or equal to 0.98. If the linearity is  
285 confirmed, 4 distinct datapoints are used to solve the equation for a given library. Here, the  
286 measure of the 20<sup>th</sup> percentile from 20M, an intermediate number of valid read pairs and from 20  
287 kb or 50 kb window sizes are used. Equation (1) is solved using R [36]. From Eq (1), the resolution  
288 can be extrapolated as Eq. (2), where x is the number of valid read pairs.

289

### 290 **Estimating and predicting the library complexity**

291 Library complexity is estimated from a 100M read pairs subsample of the library, which will be  
292 the minimum size required for the library provided by the user. The library complexity is estimated  
293 on the raw mapped read pairs (see mapping and filtering). When both ends of two pairs are mapped  
294 on the same position, they are considered as duplicate. Preseq tool is used to predict the library  
295 yield at higher sequencing depths from the duplicate distribution. To evaluate the accuracy of  
296 preseq on these data, the full GM12878 SRR1658572 library and several subsamples are also  
297 analyzed. For each subsample, the non-duplicated reads are counted and compared to the data  
298 predicted by preseq based on the 100M read pairs subsample. The perfect overlap between preseq  
299 prediction and the observed duplicate rates proves the accuracy of preseq on these data  
300 (Supplementary Figure 2).

301

### 302 **Extracting and plotting the resolution *versus* the sequencing depth**

303 Library complexity at several sequencing depths and the associated confidence intervals predicted  
304 with preseq are combined with HiCUP statistics to estimate the number of valid read pairs, and  
305 valid read pairs in cis for various library sizes. These values and their confidence intervals are then  
306 used to calculate the predicted resolution based on Eq. (2).

307

### 308 **HiC on mouse rods**

309 Mouse rods were purified from the *Nrlp*-EGFP C57BL/6J strain as described [37]. All  
310 procedures were approved by the Animal Care and Use Committee (NEI-ASP#650). Rods were  
311 fixed with 1% formaldehyde for 15 min followed by 5 min incubation with Glycine (125 mM)  
312 before cell sorting. Two million purified rods were used for HiC, per instructions from the Arima  
313 kit (Arima, # A510008). Libraries were sequenced using Illumina HiSeq 2500.

314

315

316 **Code availability:**

317

318 HiCRes pipeline is available as a docker image on [hub.docker.com/r/marchalc/hicres](https://hub.docker.com/r/marchalc/hicres). All the  
319 scripts used to produce the figures in this study are available on GitHub, as well as the  
320 benchmarking for HiCRes docker ([github.com/ClaireMarchal/HiCRes](https://github.com/ClaireMarchal/HiCRes)). The dockerfile used to  
321 generate the image is also available on GitHub.

322

323 **Data accessibility:**

324

325 The HiC dataset on mouse rods generated in this study is available on the GEO database  
326 ([www.ncbi.nlm.nih.gov/geo/](http://www.ncbi.nlm.nih.gov/geo/)) under the accession number GSE152491.

327

328



329 **Acknowledgments:**

330

331 The authors are grateful to Frederic Mentink-Vigier from the National High Magnetic Field  
332 Laboratory (FSU, FL) for providing insights that helped this study. We also thank Linn Gieser and  
333 Zachary Batz for assistance with next generation sequencing. This work is supported by Intramural  
334 Research Program of the National Eye Institute (ZIAEY000450 and ZIAEY000546) and utilized  
335 the computational resources of the NIH HPC Biowulf cluster (<http://hpc.nih.gov>).

336

337

338

339 **References:**

340

- 341 1. Cremer T, Kurz A, Zirbel R, Dietzel S, Rinke B, Schrock E, Speicher MR, Mathieu U,  
342 Jauch A, Emmerich P, et al: **Role of chromosome territories in the functional**  
343 **compartmentalization of the cell nucleus.** *Cold Spring Harb Symp Quant Biol* 1993,  
344 **58:777-792.**
- 345 2. Maya-Mendoza A, Jackson DA: **Labeling DNA Replication Foci to Visualize**  
346 **Chromosome Territories In Vivo.** *Curr Protoc Cell Biol* 2017, **75:22 21 21-22 21 16.**
- 347 3. Dixon JR, Selvaraj S, Yue F, Kim A, Li Y, Shen Y, Hu M, Liu JS, Ren B: **Topological**  
348 **domains in mammalian genomes identified by analysis of chromatin interactions.**  
349 *Nature* 2012, **485:376-380.**
- 350 4. Rowley MJ, Corces VG: **Organizational principles of 3D genome architecture.** *Nat*  
351 *Rev Genet* 2018, **19:789-800.**
- 352 5. Lu L, Liu X, Huang WK, Giusti-Rodriguez P, Cui J, Zhang S, Xu W, Wen Z, Ma S,  
353 Rosen JD, et al: **Robust Hi-C Maps of Enhancer-Promoter Interactions Reveal the**  
354 **Function of Non-coding Genome in Neural Development and Diseases.** *Mol Cell*  
355 2020.
- 356 6. Rao SS, Huntley MH, Durand NC, Stamenova EK, Bochkov ID, Robinson JT, Sanborn  
357 AL, Machol I, Omer AD, Lander ES, Aiden EL: **A 3D map of the human genome at**  
358 **kilobase resolution reveals principles of chromatin looping.** *Cell* 2014, **159:1665-**  
359 **1680.**
- 360 7. Dileep V, Ay F, Sima J, Vera DL, Noble WS, Gilbert DM: **Topologically associating**  
361 **domains and their long-range contacts are established during early G1 coincident**  
362 **with the establishment of the replication-timing program.** *Genome Res* 2015,  
363 **25:1104-1113.**
- 364 8. Nagano T, Lubling Y, Varnai C, Dudley C, Leung W, Baran Y, Mendelson Cohen N,  
365 Wingett S, Fraser P, Tanay A: **Cell-cycle dynamics of chromosomal organization at**  
366 **single-cell resolution.** *Nature* 2017, **547:61-67.**
- 367 9. Naumova N, Imakaev M, Fudenberg G, Zhan Y, Lajoie BR, Mirny LA, Dekker J:  
368 **Organization of the mitotic chromosome.** *Science* 2013, **342:948-953.**
- 369 10. Bonev B, Mendelson Cohen N, Szabo Q, Fritsch L, Papadopoulos GL, Lubling Y, Xu X,  
370 Lv X, Hugnot JP, Tanay A, Cavalli G: **Multiscale 3D Genome Rewiring during Mouse**  
371 **Neural Development.** *Cell* 2017, **171:557-572 e524.**
- 372 11. Dixon JR, Jung I, Selvaraj S, Shen Y, Antosiewicz-Bourget JE, Lee AY, Ye Z, Kim A,  
373 Rajagopal N, Xie W, et al: **Chromatin architecture reorganization during stem cell**  
374 **differentiation.** *Nature* 2015, **518:331-336.**
- 375 12. Iwasaki O, Tanizawa H, Kim KD, Kossenkov A, Nacarelli T, Tashiro S, Majumdar S,  
376 Showe LC, Zhang R, Noma KI: **Involvement of condensin in cellular senescence**  
377 **through gene regulation and compartmental reorganization.** *Nat Commun* 2019,  
378 **10:5688.**
- 379 13. Sati S, Bonev B, Szabo Q, Jost D, Bensadoun P, Serra F, Loubiere V, Papadopoulos GL,  
380 Rivera-Mulia JC, Fritsch L, et al: **4D Genome Rewiring during Oncogene-Induced**  
381 **and Replicative Senescence.** *Mol Cell* 2020, **78:522-538 e529.**

- 382 14. Cremer T, Cremer C: **Chromosome territories, nuclear architecture and gene**  
383 **regulation in mammalian cells.** *Nat Rev Genet* 2001, **2**:292-301.
- 384 15. Heinz S, Texari L, Hayes MGB, Urbanowski M, Chang MW, Givarkes N, Rialdi A,  
385 White KM, Albrecht RA, Pache L, et al: **Transcription Elongation Can Affect Genome**  
386 **3D Structure.** *Cell* 2018, **174**:1522-1536 e1522.
- 387 16. Hug CB, Grimaldi AG, Kruse K, Vaquerizas JM: **Chromatin Architecture Emerges**  
388 **during Zygotic Genome Activation Independent of Transcription.** *Cell* 2017,  
389 **169**:216-228 e219.
- 390 17. Stadhouders R, Vidal E, Serra F, Di Stefano B, Le Dily F, Quilez J, Gomez A, Collombet  
391 S, Berenguer C, Cuartero Y, et al: **Transcription factors orchestrate dynamic**  
392 **interplay between genome topology and gene regulation during cell reprogramming.**  
393 *Nat Genet* 2018, **50**:238-249.
- 394 18. Schoenfelder S, Fraser P: **Long-range enhancer-promoter contacts in gene expression**  
395 **control.** *Nat Rev Genet* 2019, **20**:437-455.
- 396 19. Gorkin DU, Leung D, Ren B: **The 3D genome in transcriptional regulation and**  
397 **pluripotency.** *Cell Stem Cell* 2014, **14**:762-775.
- 398 20. Dileep V, Wilson KA, Marchal C, Lyu X, Zhao PA, Li B, Poulet A, Bartlett DA, Rivera-  
399 Mulia JC, Qin ZS, et al: **Rapid Irreversible Transcriptional Reprogramming in**  
400 **Human Stem Cells Accompanied by Discordance between Replication Timing and**  
401 **Chromatin Compartment.** *Stem Cell Reports* 2019, **13**:193-206.
- 402 21. Marchal C, Sima J, Gilbert DM: **Control of DNA replication timing in the 3D genome.**  
403 *Nat Rev Mol Cell Biol* 2019, **20**:721-737.
- 404 22. Moindrot B, Audit B, Klous P, Baker A, Thermes C, de Laat W, Bouvet P, Mongelard F,  
405 Arneodo A: **3D chromatin conformation correlates with replication timing and is**  
406 **conserved in resting cells.** *Nucleic Acids Res* 2012, **40**:9470-9481.
- 407 23. Pope BD, Ryba T, Dileep V, Yue F, Wu W, Denas O, Vera DL, Wang Y, Hansen RS,  
408 Canfield TK, et al: **Topologically associating domains are stable units of replication-**  
409 **timing regulation.** *Nature* 2014, **515**:402-405.
- 410 24. Sima J, Chakraborty A, Dileep V, Michalski M, Klein KN, Holcomb NP, Turner JL,  
411 Paulsen MT, Rivera-Mulia JC, Trevilla-Garcia C, et al: **Identifying cis Elements for**  
412 **Spatiotemporal Control of Mammalian DNA Replication.** *Cell* 2019, **176**:816-830  
413 e818.
- 414 25. Lieberman-Aiden E, van Berkum NL, Williams L, Imakaev M, Ragozy T, Telling A,  
415 Amit I, Lajoie BR, Sabo PJ, Dorschner MO, et al: **Comprehensive mapping of long-**  
416 **range interactions reveals folding principles of the human genome.** *Science* 2009,  
417 **326**:289-293.
- 418 26. Belaghal H, Dekker J, Gibcus JH: **Hi-C 2.0: An optimized Hi-C procedure for high-**  
419 **resolution genome-wide mapping of chromosome conformation.** *Methods* 2017,  
420 **123**:56-65.
- 421 27. Schmitt AD, Hu M, Ren B: **Genome-wide mapping and analysis of chromosome**  
422 **architecture.** *Nat Rev Mol Cell Biol* 2016, **17**:743-755.
- 423 28. Lajoie BR, Dekker J, Kaplan N: **The Hitchhiker's guide to Hi-C analysis: practical**  
424 **guidelines.** *Methods* 2015, **72**:65-75.
- 425 29. Daley T, Smith AD: **Predicting the molecular complexity of sequencing libraries.** *Nat*  
426 *Methods* 2013, **10**:325-327.

- 427 30. Norrie JL, Lupo MS, Xu B, Al Diri I, Valentine M, Putnam D, Griffiths L, Zhang J,  
428 Johnson D, Easton J, et al: **Nucleome Dynamics during Retinal Development.** *Neuron*  
429 2019, **104**:512-528 e511.
- 430 31. Langmead B, Salzberg SL: **Fast gapped-read alignment with Bowtie 2.** *Nat Methods*  
431 2012, **9**:357-359.
- 432 32. Wingett S, Ewels P, Furlan-Magaril M, Nagano T, Schoenfelder S, Fraser P, Andrews S:  
433 **HiCUP: pipeline for mapping and processing Hi-C data.** *F1000Res* 2015, **4**:1310.
- 434 33. Durand NC, Shamim MS, Machol I, Rao SS, Huntley MH, Lander ES, Aiden EL: **Juicer**  
435 **Provides a One-Click System for Analyzing Loop-Resolution Hi-C Experiments.**  
436 *Cell Syst* 2016, **3**:95-98.
- 437 34. Yardimci GG, Ozadam H, Sauria MEG, Ursu O, Yan KK, Yang T, Chakraborty A, Kaul  
438 A, Lajoie BR, Song F, et al: **Measuring the reproducibility and quality of Hi-C data.**  
439 *Genome Biol* 2019, **20**:57.
- 440 35. Quinlan AR: **BEDTools: The Swiss-Army Tool for Genome Feature Analysis.** *Curr*  
441 *Protoc Bioinformatics* 2014, **47**:11 12 11-34.
- 442 36. R Core Team: **R: A language and environment for statistical computing.** Vienna,  
443 Austria: R Foundation for Statistical Computing; 2019.
- 444 37. Akimoto M, Cheng H, Zhu D, Brzezinski JA, Khanna R, Filippova E, Oh EC, Jing Y,  
445 Linares JL, Brooks M, et al: **Targeting of GFP to newborn rods by Nrl promoter and**  
446 **temporal expression profiling of flow-sorted photoreceptors.** *Proc Natl Acad Sci U S*  
447 *A* 2006, **103**:3890-3895.
- 448

449

450

451 **Legend to figures:**

452 **Figure 1.**

453 A. Variation of 20<sup>th</sup> percentile of the coverage with the window size (A) and the subsample size  
454 (B) used to calculate the coverage. For each data subsample (A) and each window size (B), this  
455 variation is linear. The grey lines represent the limit used to determine the resolution. C. 3D plot  
456 showing the prediction of the 20<sup>th</sup> percentile of window coverage by our model *versus* the window  
457 size and the number of valid read pairs. The surface represents the function predicting the 20<sup>th</sup>  
458 percentile for any window size and valid read number, while the dots are the observed 20<sup>th</sup>  
459 percentile for each window size / valid read pairs. The color scale represents the 20<sup>th</sup> percentile. D.  
460 Predicted resolution versus the number of valid read pairs. Predictions are computed using a 100M  
461 sequenced read pairs subsample. Observed resolutions of several subsamples are plotted as an  
462 interval containing the observed resolution (red segment).

463

464 **Figure 2.**

465 A. The HiCRes pipeline combines preseq which predicts library complexity, bowtie2 and HiCUP  
466 which map reads and calculate the percentage of valid read pairs, and HiCRes, which predicts the  
467 HiC resolution. This pipeline predicts the resolution of a given HiC library at different sequencing  
468 levels. B. Predicted resolution versus the sequencing depth in GM12878 used for the model.  
469 Predictions are calculated using a 100M read pairs (grey dotted line) subsample. Observed  
470 resolution of the total library is plotted as an interval containing the observed resolution (red  
471 segment). C. Predicted resolution versus the sequencing depth in datasets not used for the model:  
472 HMEK (left panel) and NHEK (right panel). Predictions are calculated using a 100M read pairs

473 (grey dotted line) subsample. Observed resolutions of the total library are plotted as an interval  
474 containing the observed resolution (red segment).

475

476 **Figure 3.**

477 A-C. Predicted resolution versus the sequencing depth in datasets from various species / HiC  
478 protocols: GM12878 using HindIII restriction (A), Mouse retina using MboI digestion (B) and  
479 Mouse rods using Arima kit (C). Predictions are calculated using a 100M read pairs (grey dotted  
480 line) subsample. Observed resolutions of the total library are plotted as an interval containing the  
481 observed resolution (red segment).

482

483 **Figure 4**

484 A. Predicted resolution versus the sequencing depth for a HiC datasets in GM12878 with a low  
485 proportion of *trans*-interactions (A) and with a higher proportion of *trans*-interactions (B) using  
486 all interactions (red) or *cis*-interactions only (blue).

487

488

# Figure 1

(which was not certified by peer review) is the author/funder, who has granted bioRxiv a license to display the preprint in perpetuity. It is made available under aCC-BY-ND 4.0 International license.

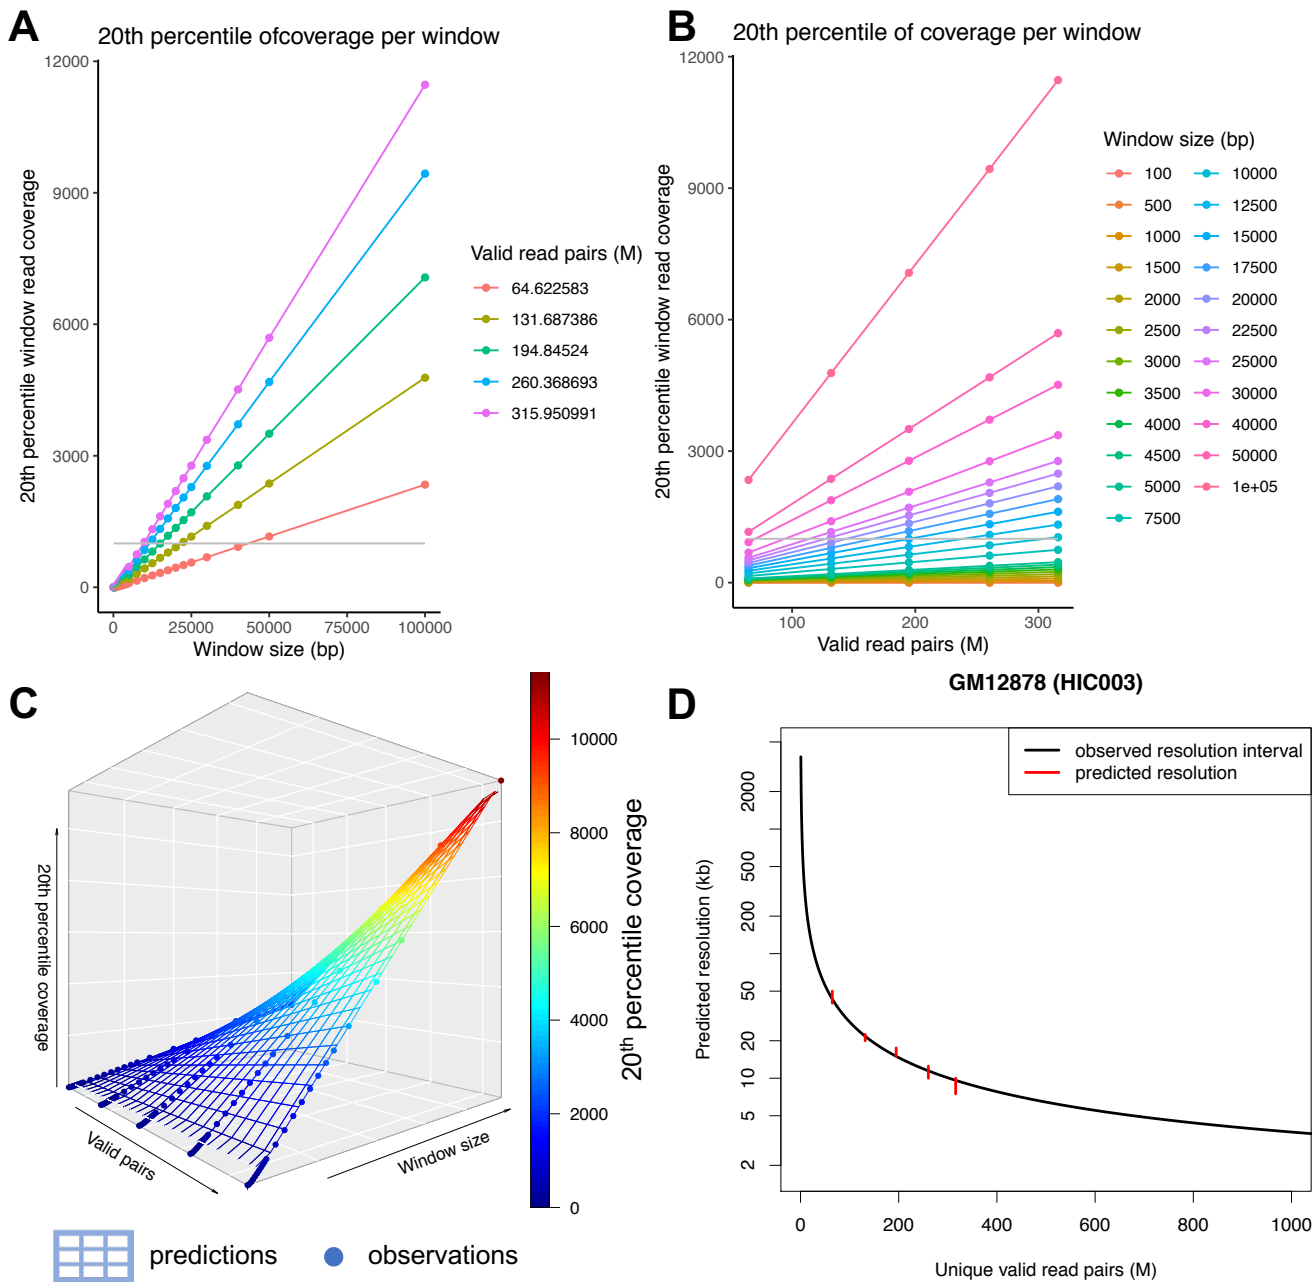

**A**

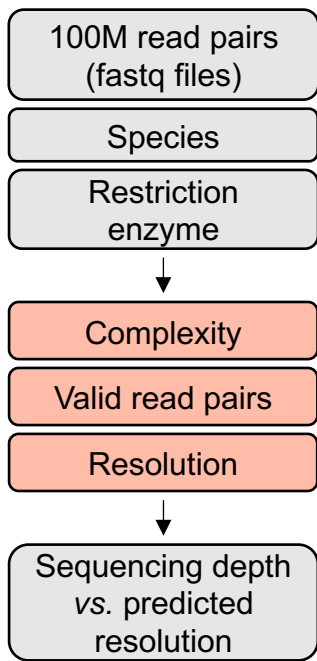

**B**

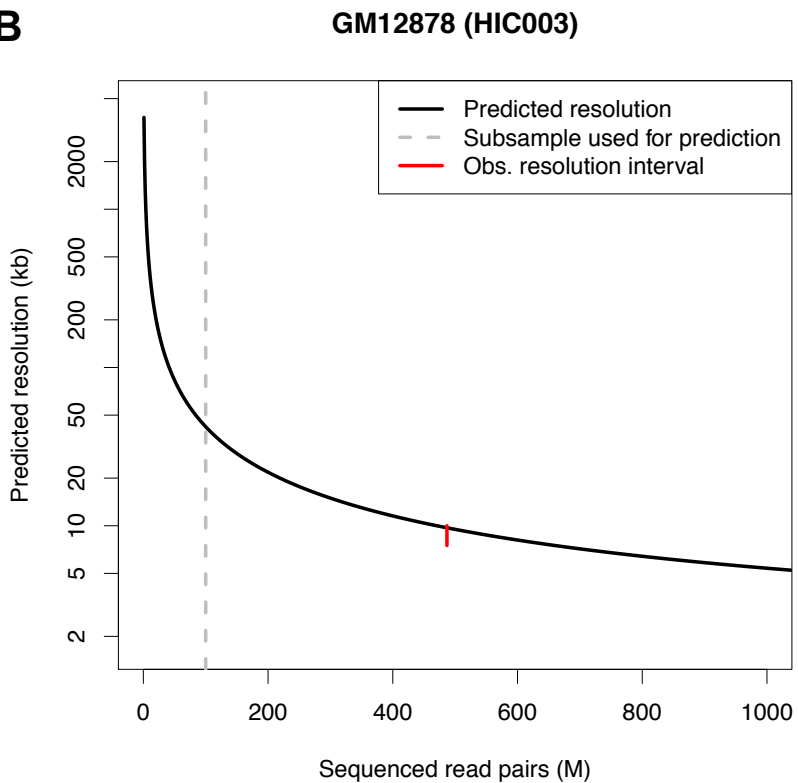

**C**

**HMEK (HIC058)**

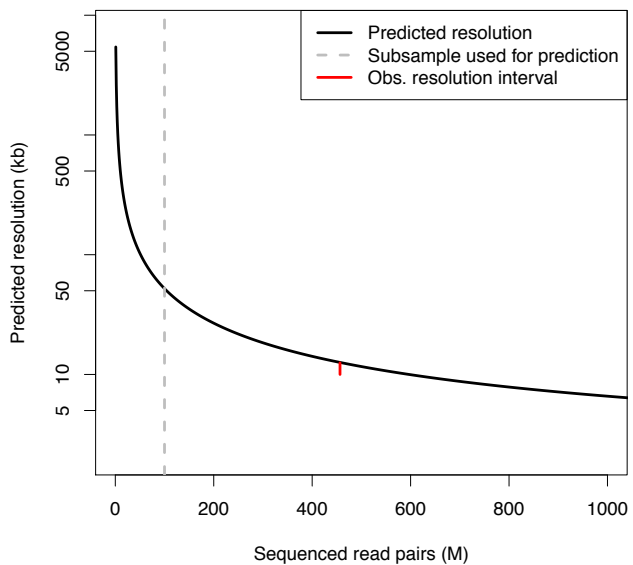

**NHEK (HIC067)**

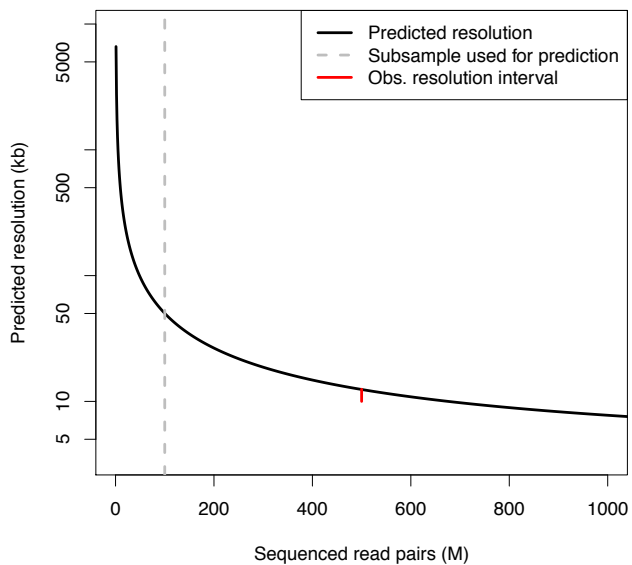



# Figure 3

(which was not certified by peer review) is the author/funder, who has granted bioRxiv a license to display the preprint in perpetuity. It is made available under aCC-BY-ND 4.0 International license.

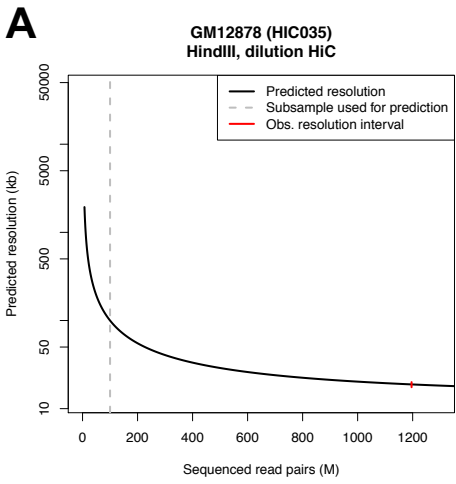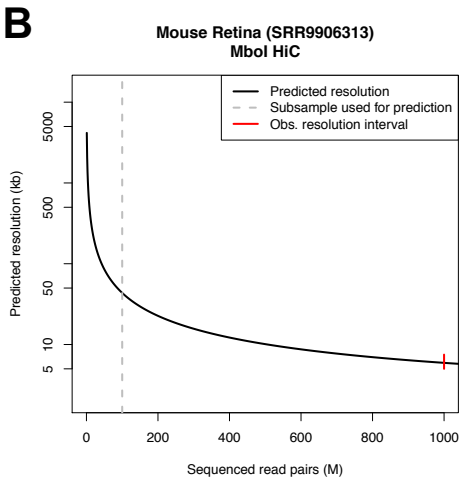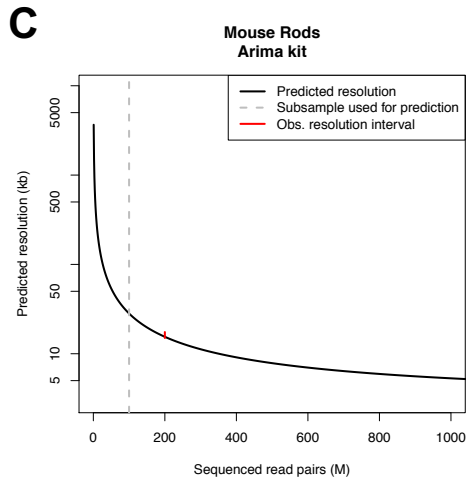

# Figure 4

(which was not certified by peer review) is the author/funder, who has granted bioRxiv a license to display the preprint in perpetuity. It is made available under aCC-BY-ND 4.0 International license.

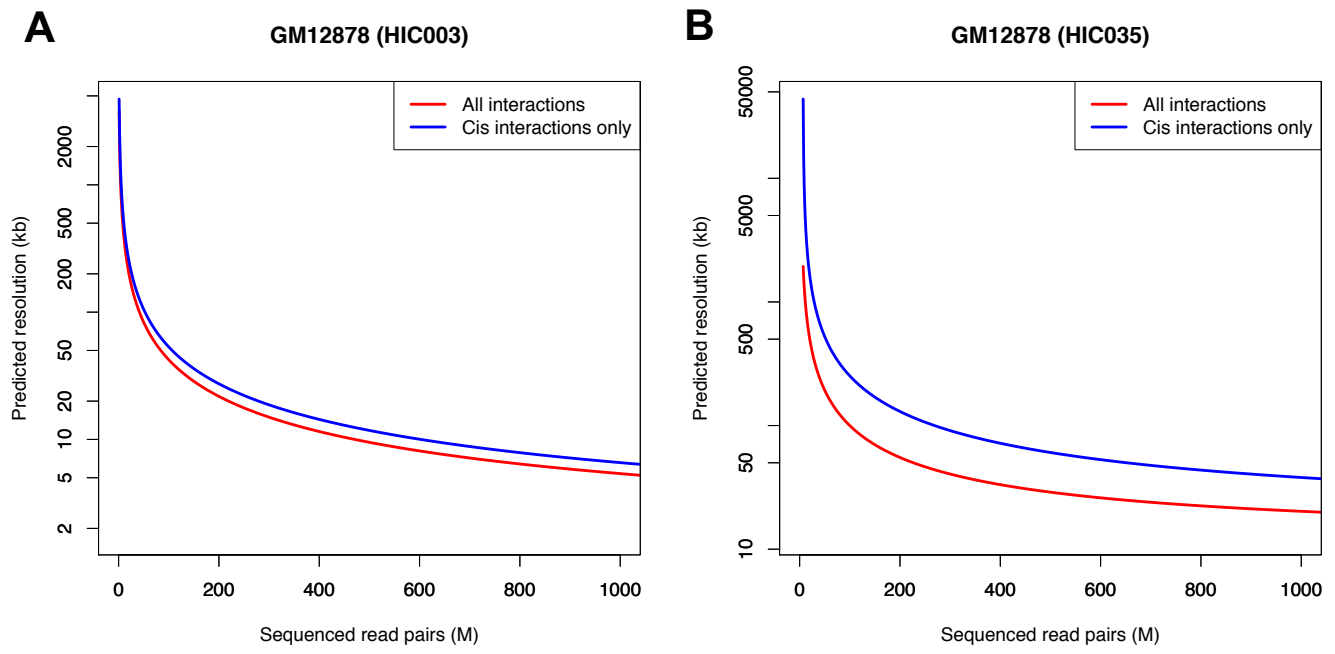

Source: http://biorxiv.org/content/10.1101/2020.09.22.307967v1.full.pdf
